# Supplementary material
Source: PubMed Central journal article supplement (PMC7013482)

## Autumn migration of European honey buzzards from Finland

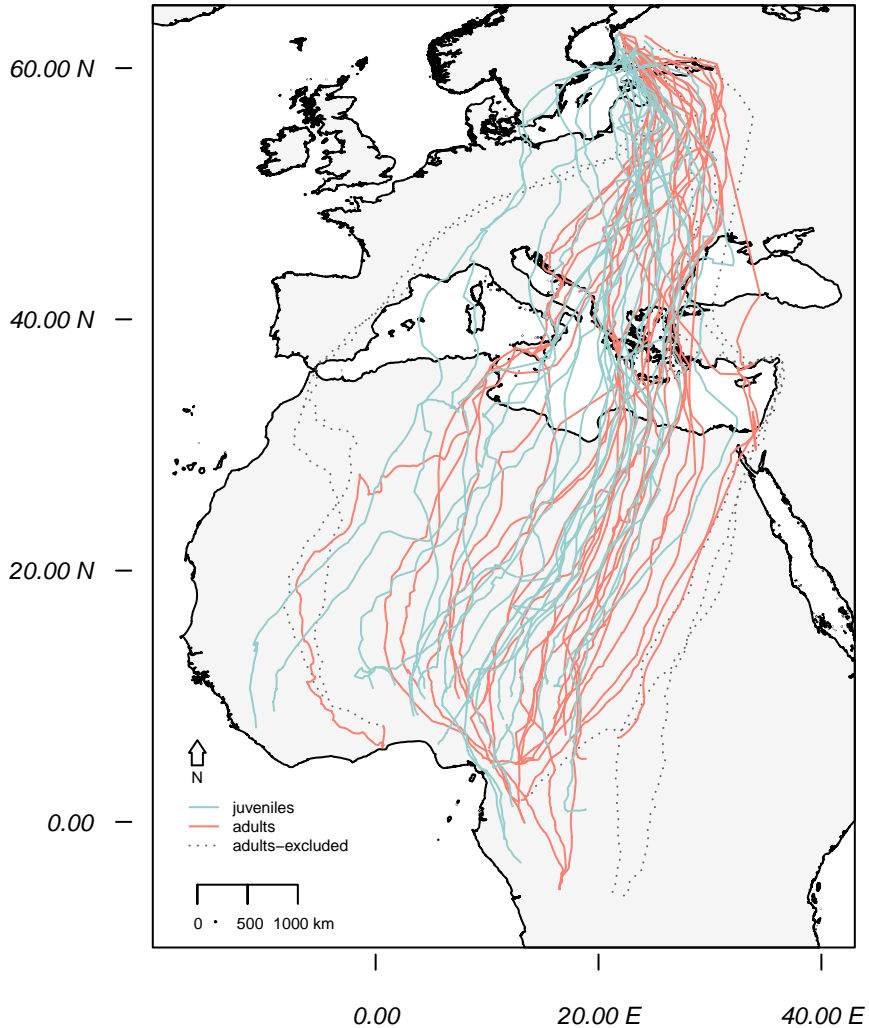

Supplement: rsbl20190797supp2.pdf [file rsbl20190797supp2.pdf]
