# Supplementary material
Source: PubMed Central journal article supplement (PMC7013482)

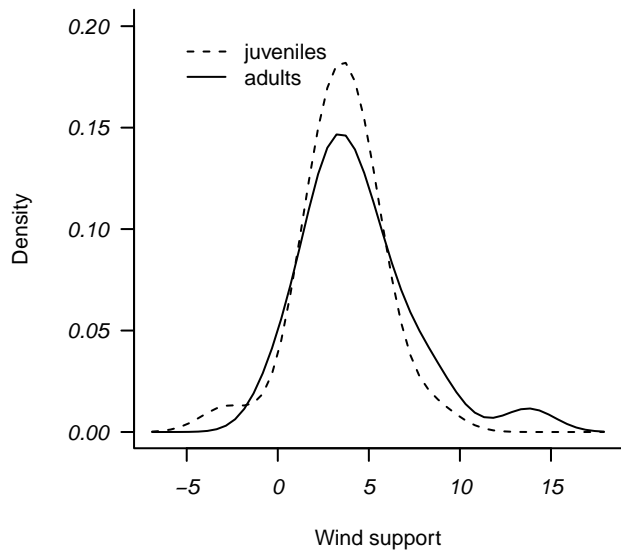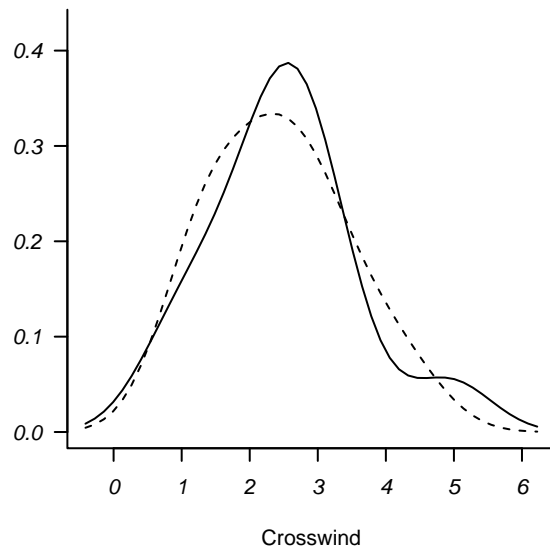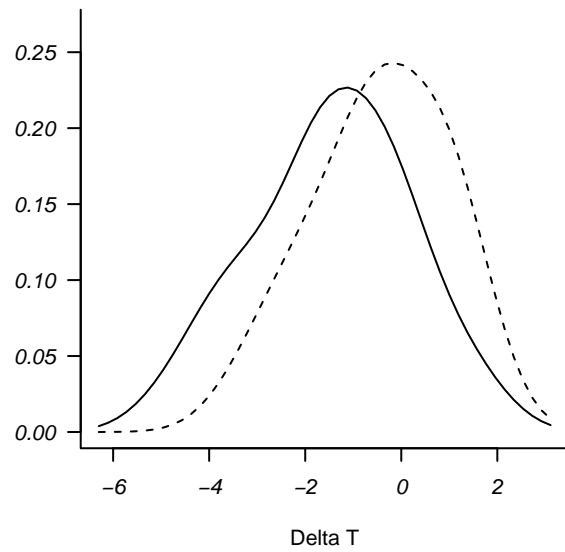

Supplement: rsbl20190797supp4.pdf [file rsbl20190797supp4.pdf]
